# Supplementary material for: Prior reproduction alters how mitochondria respond to an oxidative event
Source: Oxford University Press journal article supplement (doi:10.1242/jeb.195545), 2019-01-01
Supplement: jeb195545supp.pdf [file jeb195545supp.pdf]

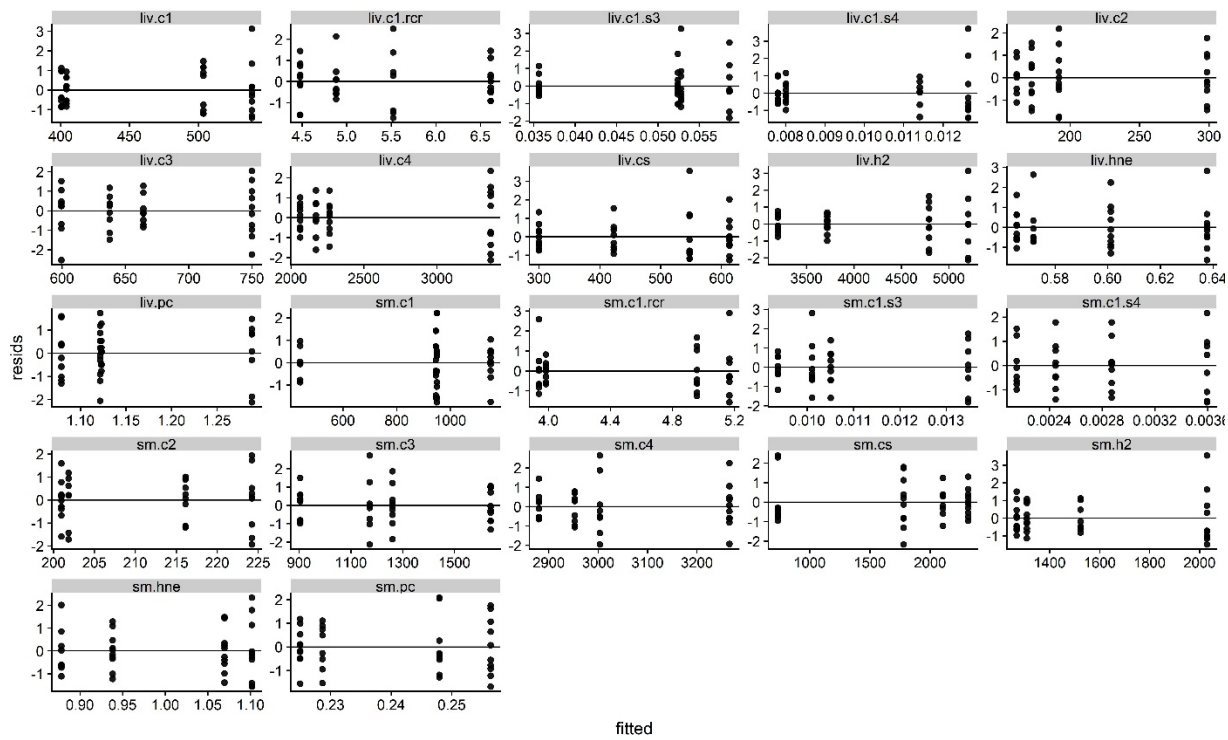

Figure S1. Standardized residuals plotted against the fitted values (estimated means from the model) from linear models. The header over each model result follows the conventions of the abbreviations described below.

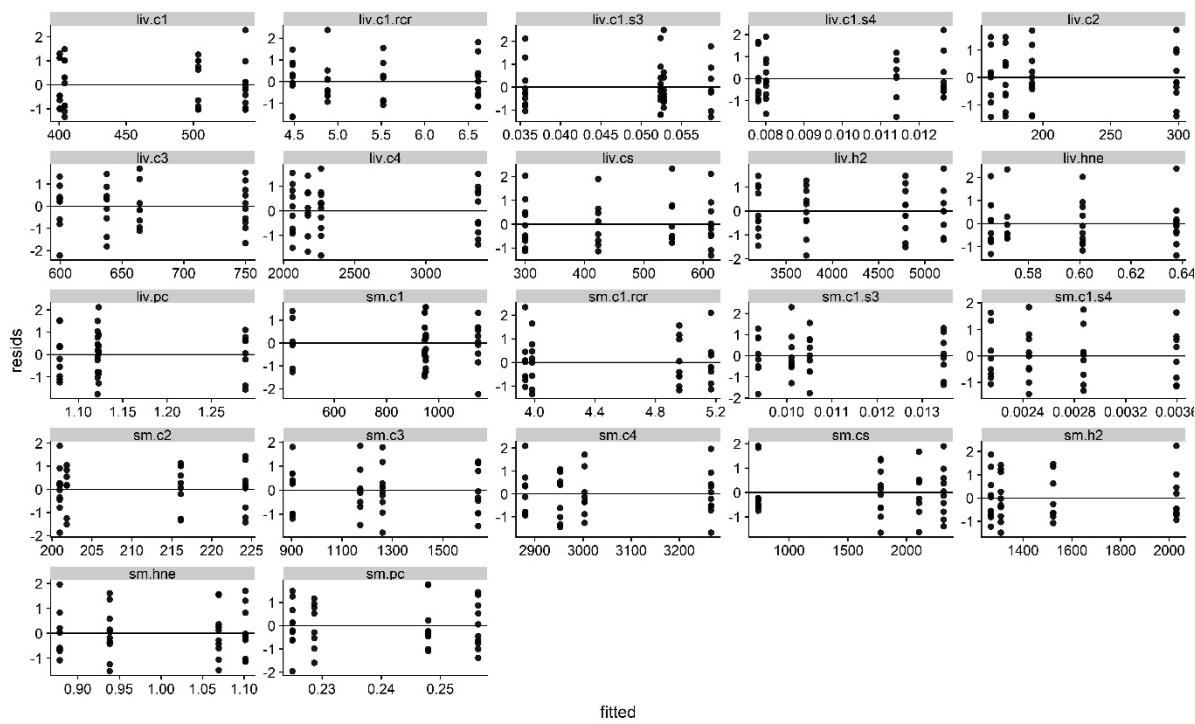

Figure S2. Standardized residuals plotted against the fitted values (estimated means from the model) from generalized least squares models. The header over each model result follows the conventions of the abbreviations described below.

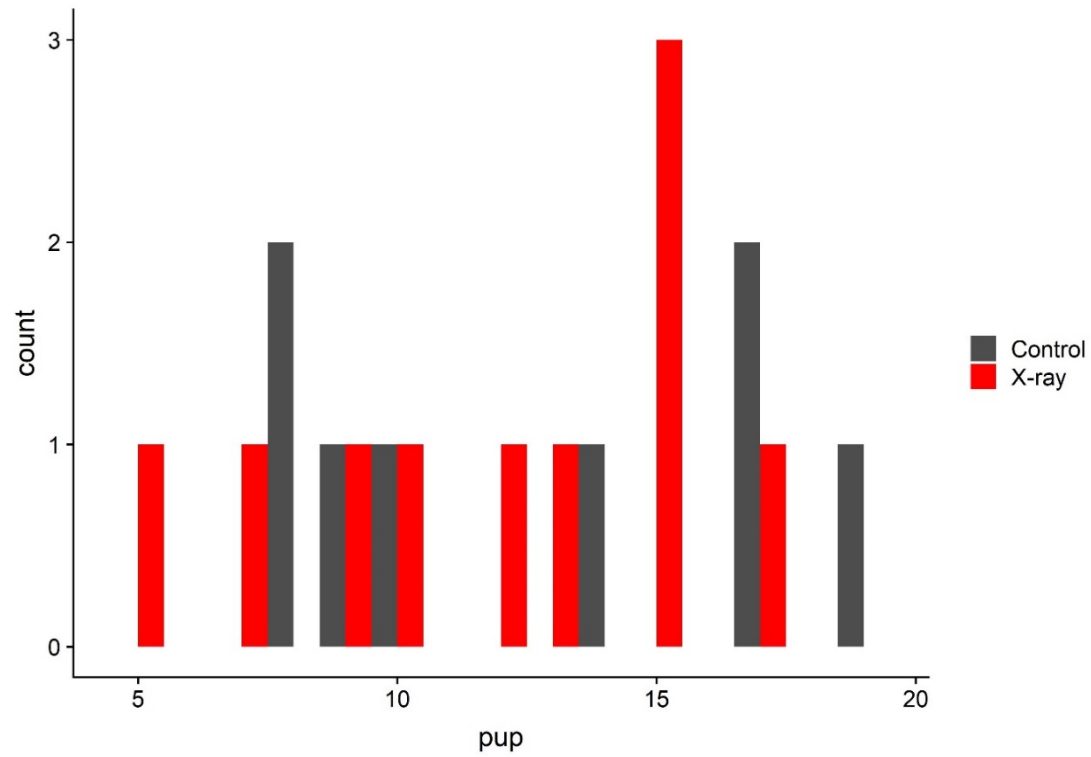

Figure S3. The number of pups weaned by x-irradiated (red) and non-irradiated (gray) female mice.

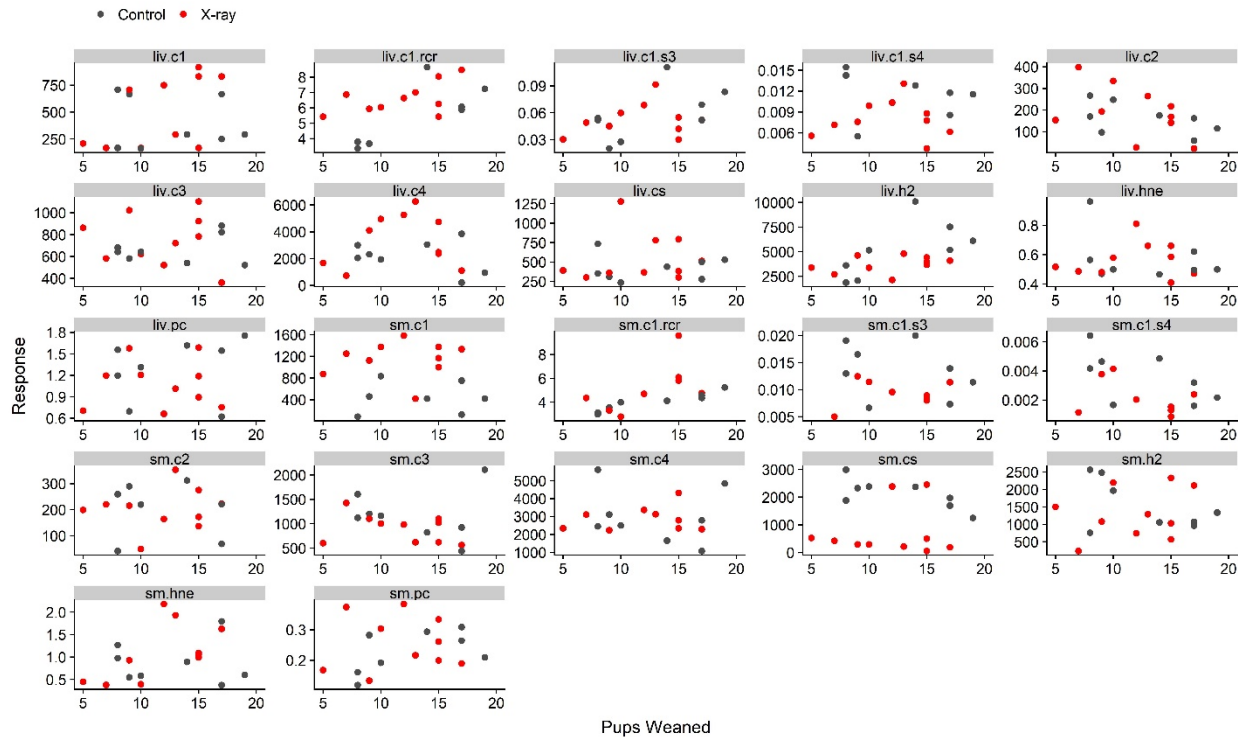

Fig S4. The effect of number of pups weaned on each measure of mitochondrial performance and oxidative stress for x-irradiated mice (red dots) and non-irradiated mice (gray dots). Results are from a generalized least squares model. The y-axis units for each model are presented in the main text. The header over each model result follows the conventions of the abbreviations described below.

#### Abbreviations

nr = non-reproductive, virgin mice

r = reproductive mice

x = x-irradiated mice

con = non-irradiated mice

liv = liver

sm = skeletal muscle

c1 = complex I of the electron transport system (ETS)

c2 = complex II activity of ETS

c3 = complex III activity of ETS

c4 = complex IV activity of ETS

cs = citrate synthase activity

s3 = state 3 respiration

s4 = state 4 respiration

rcr = respiratory control ratio

h2 = H<sub>2</sub>O<sub>2</sub> production

hne = 4-Hydroxynonenal

pc = protein carbonyl

The header above each model result represents a specific measure taken from the tissue listed. For example, liv.c1.s3 is state 3 respiration of liver mitochondria using complex I substrates. sm.c2 is complex II activity of skeletal muscle, and so on.

**Table S1.** Raw means and standard deviations for mitochondrial measurements and p-value results of the effect of reproduction, x-irradiation (x-ray) exposure, and their interaction from Generalized Least Squares linear models. Significant values are in bold.

|                                                                        | Virgin females         |                        | Reproductive females   |                        | P-values                     |                              |                                      |                                     |
|------------------------------------------------------------------------|------------------------|------------------------|------------------------|------------------------|------------------------------|------------------------------|--------------------------------------|-------------------------------------|
|                                                                        | Control (A)<br>n = 10  | X-ray (B)<br>n = 10    | Control (C)<br>n = 8   | X-ray (D)<br>n = 10    | Repro<br>(C vs. A)<br>n = 18 | X-ray<br>(B vs. A)<br>n = 20 | Repro + X-ray<br>(D vs. A)<br>n = 20 | Interaction<br>(all data)<br>n = 38 |
| <b>Liver</b>                                                           |                        |                        |                        |                        |                              |                              |                                      |                                     |
| Mitochondrial density - CS activity<br>(nmol/min/mg protein)           | 613 <sub>±</sub> 197   | 300 <sub>±</sub> 135   | 423 <sub>±</sub> 164   | 548 <sub>±</sub> 314   | <b>0.032</b>                 | <b>0.0002</b>                | 0.580                                | <b>0.003</b>                        |
| <i>Respiration via complex 1 substrates</i>                            |                        |                        |                        |                        |                              |                              |                                      |                                     |
| RCR (state 3/state 4 respiration)                                      | 4.48 <sub>±</sub> 1.25 | 4.88 <sub>±</sub> 1.14 | 5.52 <sub>±</sub> 2.01 | 6.61 <sub>±</sub> 1.02 | 0.233                        | 0.468                        | <b>&lt; 0.001</b>                    | 0.493                               |
| state 3 respiration<br>(pmol/min/CS activity)                          | 52.8 <sub>±</sub> 27.9 | 35.6 <sub>±</sub> 11.5 | 58.6 <sub>±</sub> 29.3 | 52.4 <sub>±</sub> 18.3 | 0.670                        | 0.081                        | 0.971                                | 0.478                               |
| state 4 respiration<br>(pmol/min/CS activity)                          | 12.6 <sub>±</sub> 7.3  | 7.80 <sub>±</sub> 2.64 | 11.4 <sub>±</sub> 3.40 | 8.01 <sub>±</sub> 2.66 | 0.647                        | 0.060                        | 0.070                                | 0.626                               |
| <i>Complex activity</i>                                                |                        |                        |                        |                        |                              |                              |                                      |                                     |
| complex I (nmol/min/mg protein)                                        | 404 <sub>±</sub> 177   | 539 <sub>±</sub> 385   | 400 <sub>±</sub> 237   | 504 <sub>±</sub> 327   | 0.971                        | 0.322                        | 0.403                                | 0.868                               |
| complex II (nmol/min/mg protein)                                       | 172 <sub>±</sub> 99    | 299 <sub>±</sub> 96    | 162 <sub>±</sub> 72    | 192 <sub>±</sub> 120   | 0.791                        | <b>0.007</b>                 | 0.691                                | 0.138                               |
| complex III (nmol/min/mg protein)                                      | 599 <sub>±</sub> 197   | 638 <sub>±</sub> 141   | 664 <sub>±</sub> 129   | 750 <sub>±</sub> 234   | 0.408                        | 0.623                        | 0.129                                | 0.680                               |
| complex IV (nmol/min/mg protein)                                       | 2063 <sub>±</sub> 813  | 2263 <sub>±</sub> 983  | 2171 <sub>±</sub> 1176 | 3368 <sub>±</sub> 1931 | 0.827                        | 0.623                        | 0.057                                | 0.240                               |
| ROS indicator - H <sub>2</sub> O <sub>2</sub><br>(pmol/min/mg protein) | 4790 <sub>±</sub> 1784 | 3197 <sub>±</sub> 826  | 5203 <sub>±</sub> 2772 | 3718 <sub>±</sub> 847  | 0.717                        | <b>0.015</b>                 | 0.095                                | 0.928                               |
| <i>Oxidative damage</i>                                                |                        |                        |                        |                        |                              |                              |                                      |                                     |

|                                                                     |                   |                   |                       |                   |              |              |                   |                   |
|---------------------------------------------------------------------|-------------------|-------------------|-----------------------|-------------------|--------------|--------------|-------------------|-------------------|
| Lipids - 4HNE adducts (arbitrary units)                             | 0.601 $\pm$ 0.166 | 0.638 $\pm$ 0.179 | 0.572 $\pm$ 0.16<br>7 | 0.565 $\pm$ 0.119 | 0.711        | 0.639        | 0.584             | 0.683             |
| Proteins - Protein carbonyls (arbitrary units)                      | 1.12 $\pm$ 0.37   | 1.12 $\pm$ 0.19   | 1.29 $\pm$ 0.43       | 1.08 $\pm$ 0.33   | 0.388        | 0.991        | 0.789             | 0.359             |
| <b>Muscle</b>                                                       |                   |                   |                       |                   |              |              |                   |                   |
| Mitochondrial density - CS activity (nmol/min/mg protein)           | 1779 $\pm$ 944    | 2316 $\pm$ 493    | 2107 $\pm$ 526        | 735 $\pm$ 899     | 0.359        | 0.120        | <b>0.016</b>      | <b>&lt; 0.001</b> |
| <u>Respiration via complex 1 substrates</u>                         |                   |                   |                       |                   |              |              |                   |                   |
| RCR (state 3/state 4 respiration)                                   | 3.94 $\pm$ 1.71   | 4.96 $\pm$ 1.65   | 3.98 $\pm$ 0.76       | 5.17 $\pm$ 2.11   | 0.944        | 0.208        | 0.201             | 0.884             |
| state 3 respiration (pmol/min/CS activity)                          | 10.1 $\pm$ 4.62   | 10.5 $\pm$ 3.39   | 13.5 $\pm$ 4.95       | 9.37 $\pm$ 2.40   | 0.150        | 0.830        | 0.665             | 0.102             |
| state 4 respiration (pmol/min/CS activity)                          | 2.87 $\pm$ 1.34   | 2.44 $\pm$ 1.28   | 3.59 $\pm$ 1.73       | 2.15 $\pm$ 1.22   | 0.347        | 0.497        | 0.255             | 0.302             |
| <u>Complex activity</u>                                             |                   |                   |                       |                   |              |              |                   |                   |
| complex I (nmol/min/mg protein)                                     | 945 $\pm$ 450     | 950 $\pm$ 592     | 440 $\pm$ 282         | 1150 $\pm$ 328    | <b>0.008</b> | 0.986        | 0.254             | <b>0.016</b>      |
| complex II (nmol/min/mg protein)                                    | 224 $\pm$ 129     | 216 $\pm$ 85      | 202 $\pm$ 106         | 201 $\pm$ 81      | 0.705        | 0.874        | 0.645             | 0.920             |
| complex III (nmol/min/mg protein)                                   | 1640 $\pm$ 306    | 1261 $\pm$ 360    | 1173 $\pm$ 504        | 904 $\pm$ 288     | <b>0.029</b> | <b>0.016</b> | <b>&lt; 0.001</b> | 0.660             |
| complex IV (nmol/min/mg protein)                                    | 2952 $\pm$ 734    | 3266 $\pm$ 1136   | 3003 $\pm$ 1525       | 2880 $\pm$ 686    | 0.932        | 0.469        | 0.825             | 0.550             |
| ROS indicator - H <sub>2</sub> O <sub>2</sub> (pmol/min/mg protein) | 2029 $\pm$ 1493   | 1267 $\pm$ 754    | 1524 $\pm$ 714        | 1309 $\pm$ 720    | 0.351        | 0.159        | 0.178             | 0.391             |
| <u>Oxidative damage</u>                                             |                   |                   |                       |                   |              |              |                   |                   |
| Lipids - 4HNE adducts (arbitrary units)                             | 0.938 $\pm$ 0.371 | 1.069 $\pm$ 0.433 | 0.878 $\pm$ 0.46<br>7 | 1.102 $\pm$ 0.635 | 0.768        | 0.472        | 0.487             | 0.772             |

|                                                   |                          |                          |                                      |                          |       |       |       |       |
|---------------------------------------------------|--------------------------|--------------------------|--------------------------------------|--------------------------|-------|-------|-------|-------|
| Proteins - Protein carbonyls<br>(arbitrary units) | 0.248 <sub>±</sub> 0.086 | 0.225 <sub>±</sub> 0.057 | 0.229 <sub>±</sub> 0.06 <sub>9</sub> | 0.256 <sub>±</sub> 0.089 | 0.601 | 0.489 | 0.830 | 0.314 |
|---------------------------------------------------|--------------------------|--------------------------|--------------------------------------|--------------------------|-------|-------|-------|-------|
